# Supplementary material for: Extracellular vesicles are the main contributor to the non-viral protected extracellular sequence space
Source: PubMed Central journal article supplement (PMC10582014; doi:10.1038/s43705-023-00317-6), 2023-10-17

## Figure S5 - Coverage Plots

Binned (bin size = 1000 bp) coverage plots of all analyzed MAGs.

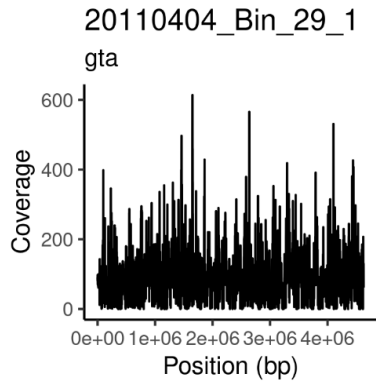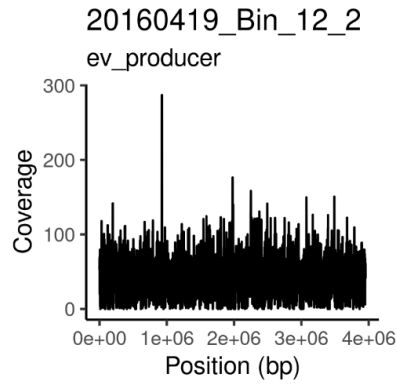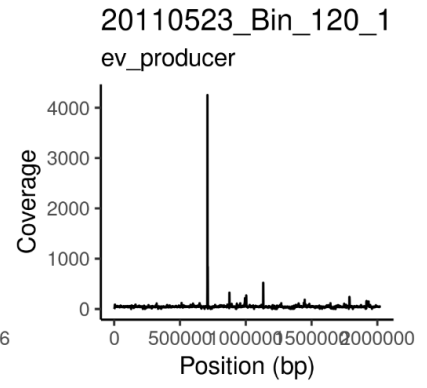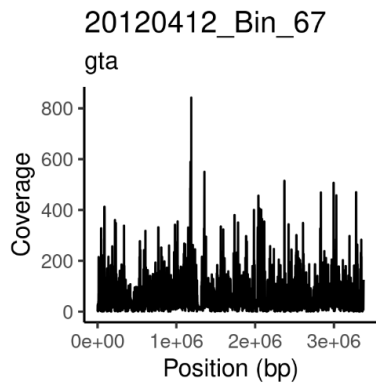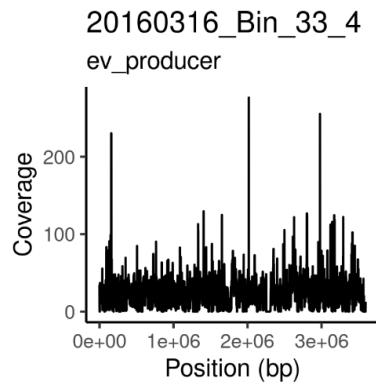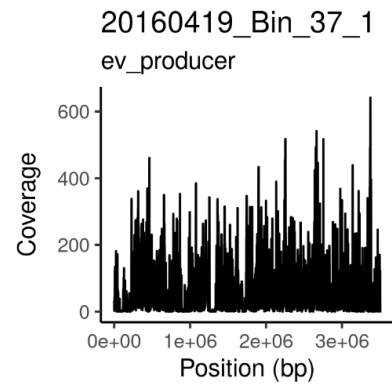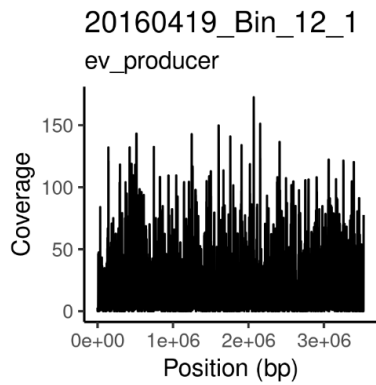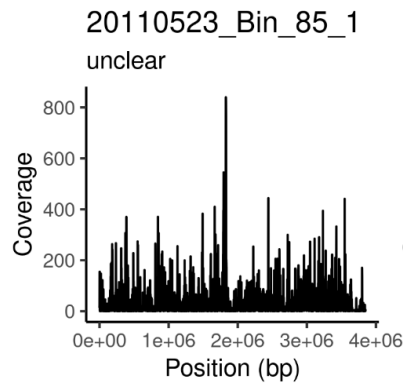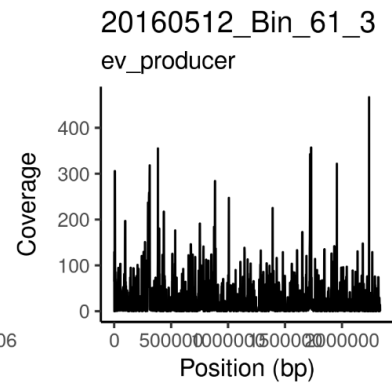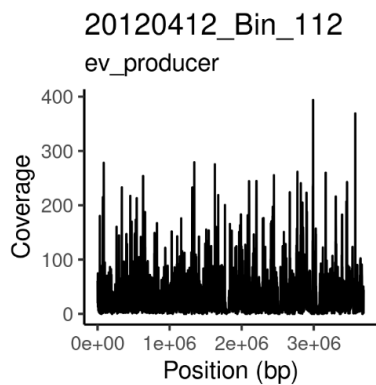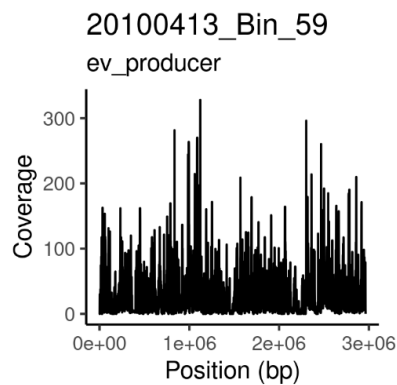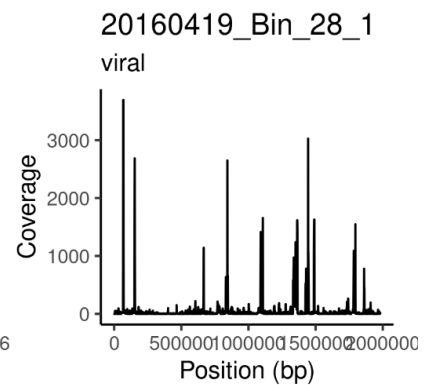

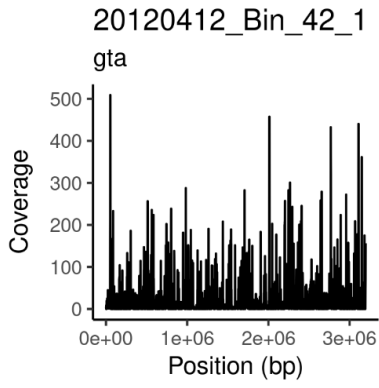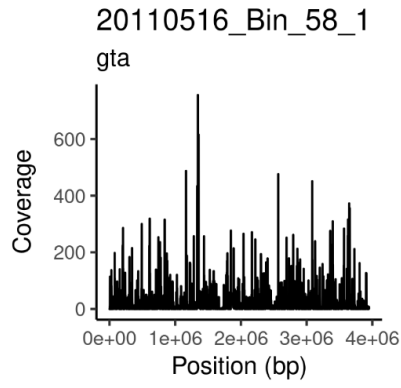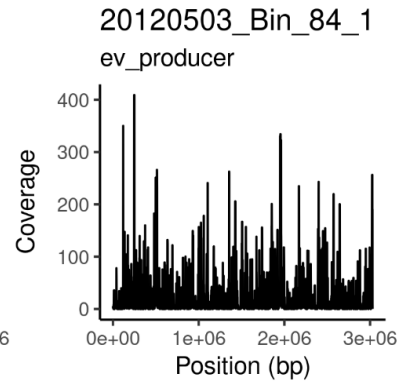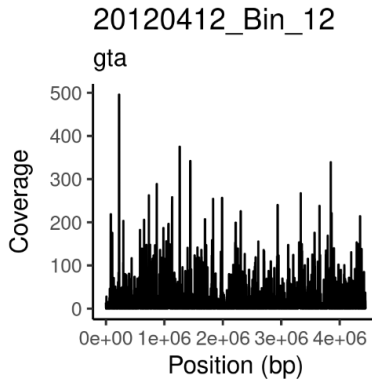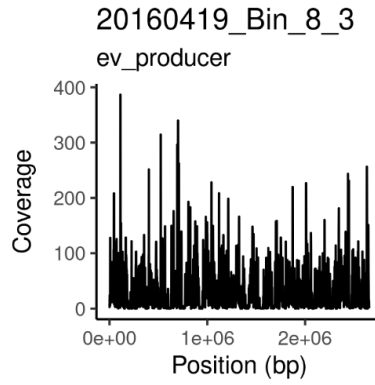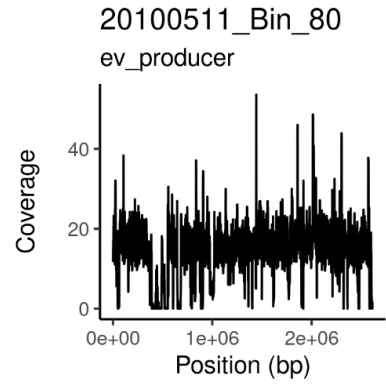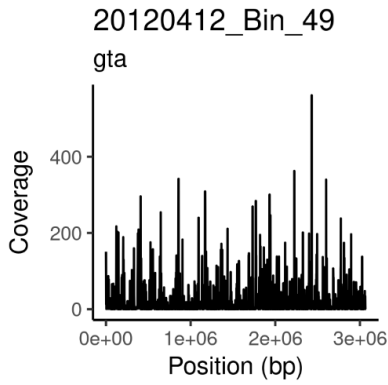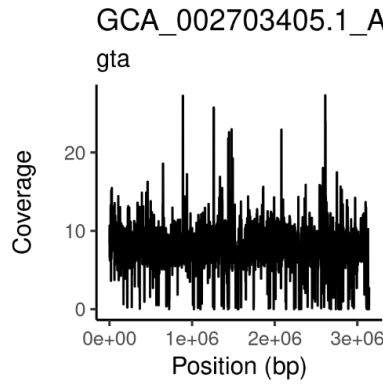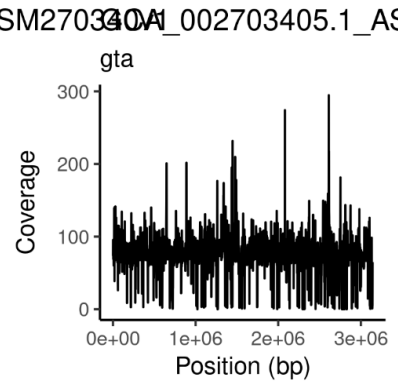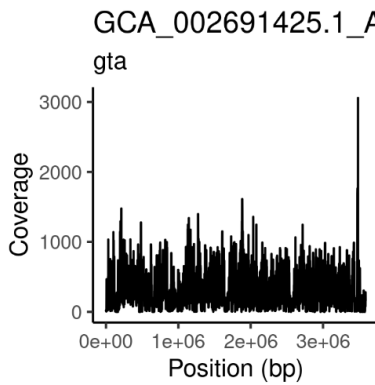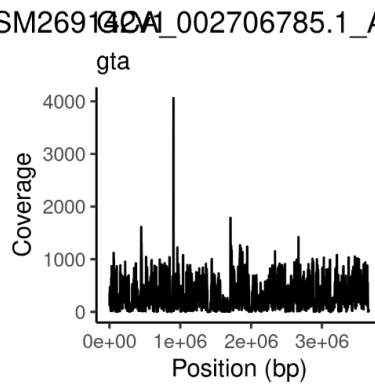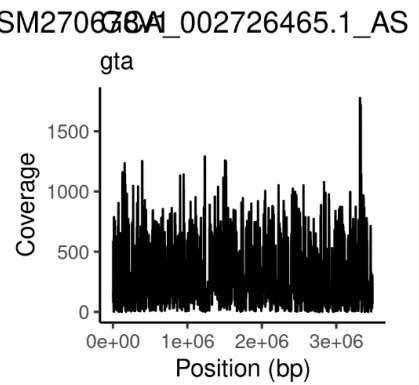

GCA\_002716265.1\_ASM271626.1\_002693125.1\_ASM269312.1\_002731875.1\_AS

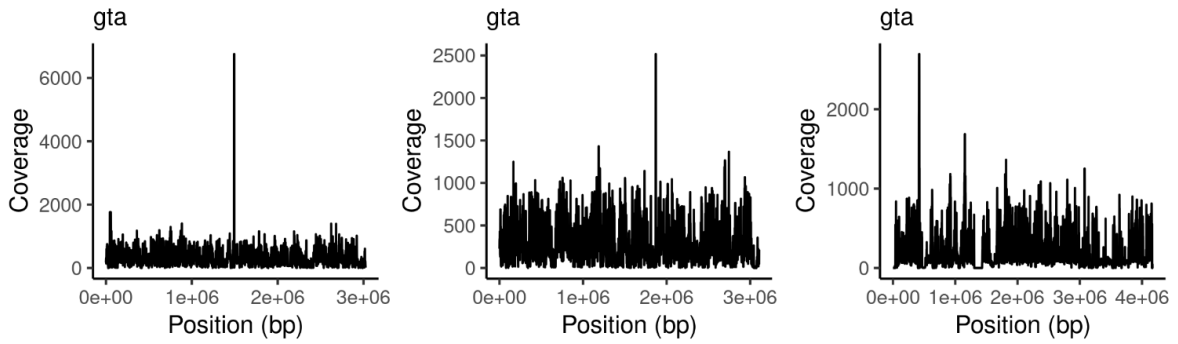

GCA\_002708965.1\_ASM270896.1\_002684135.1\_ASM268413.1\_002703405.1\_AS

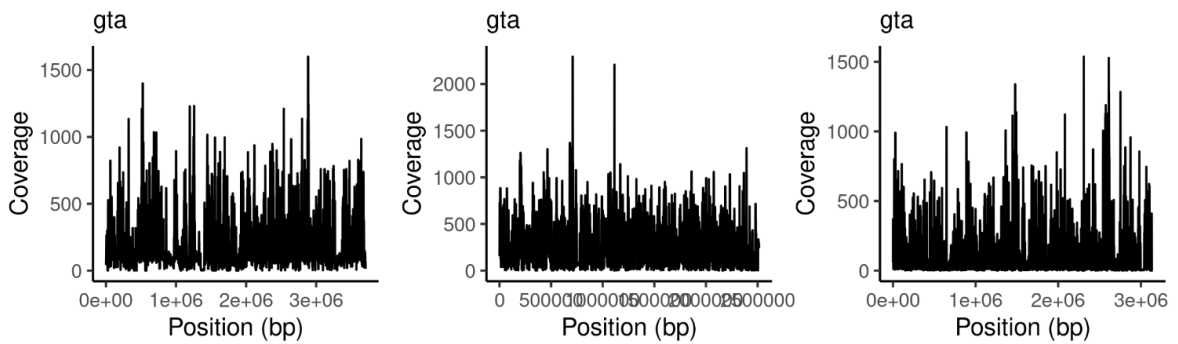

GCA\_002706905.1\_ASM270690.1\_002685095.1\_ASM268509.1\_002731875.1\_AS

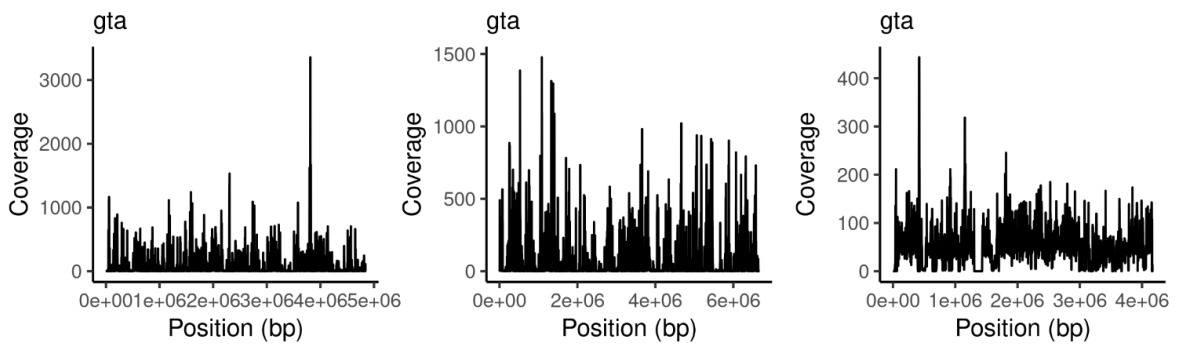

GCA\_002691425.1\_ASM269142.1\_002706785.1\_ASM270678.1\_002726465.1\_AS

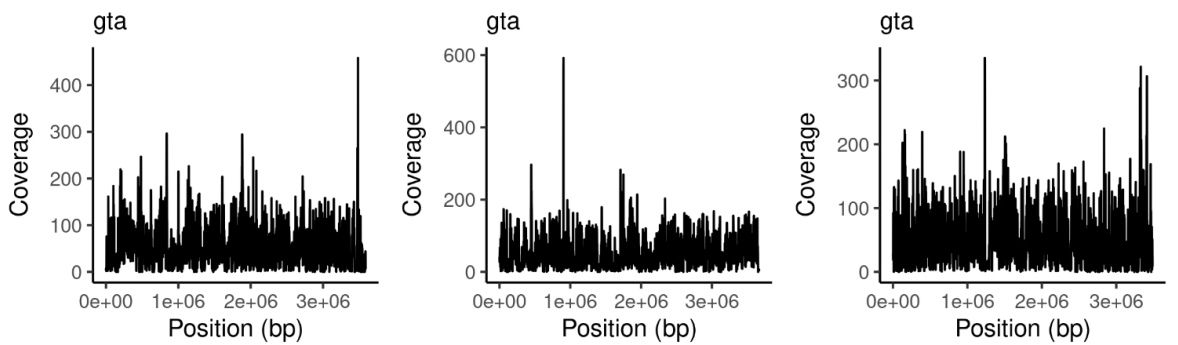





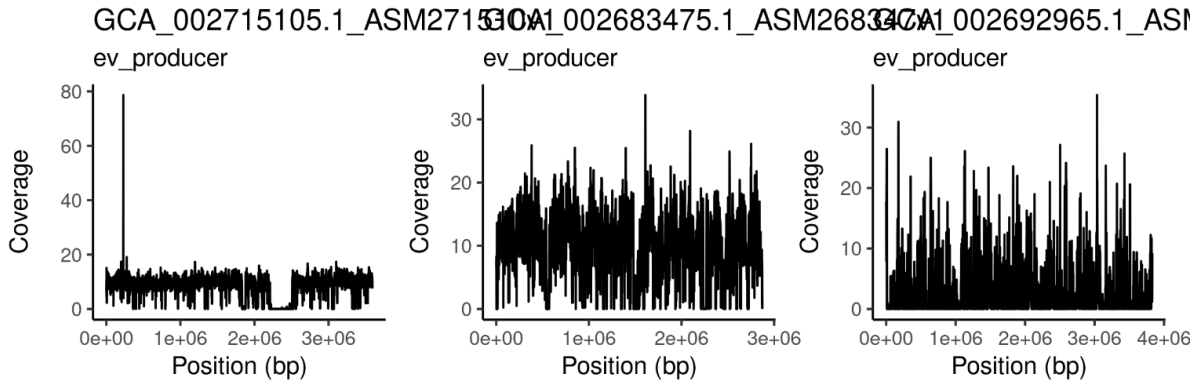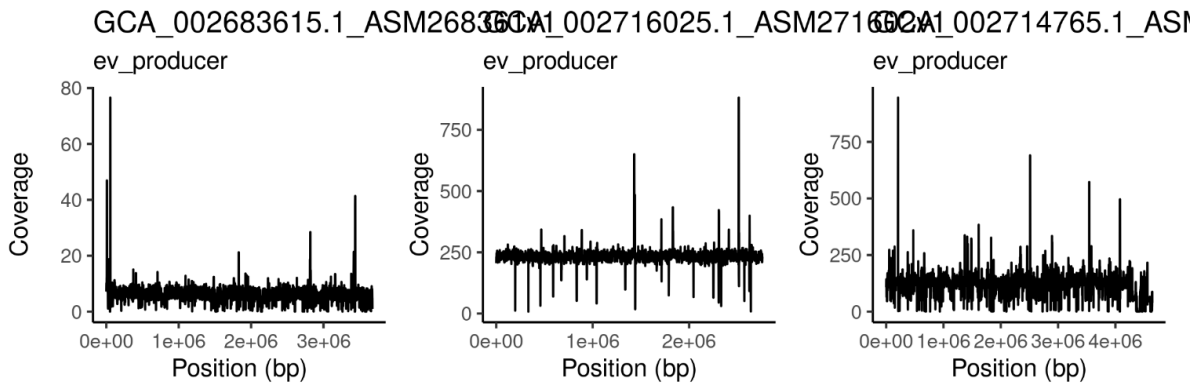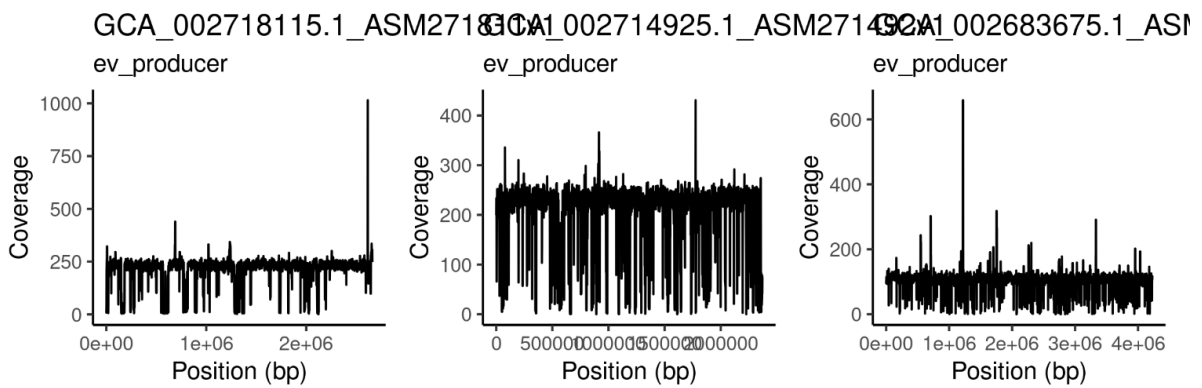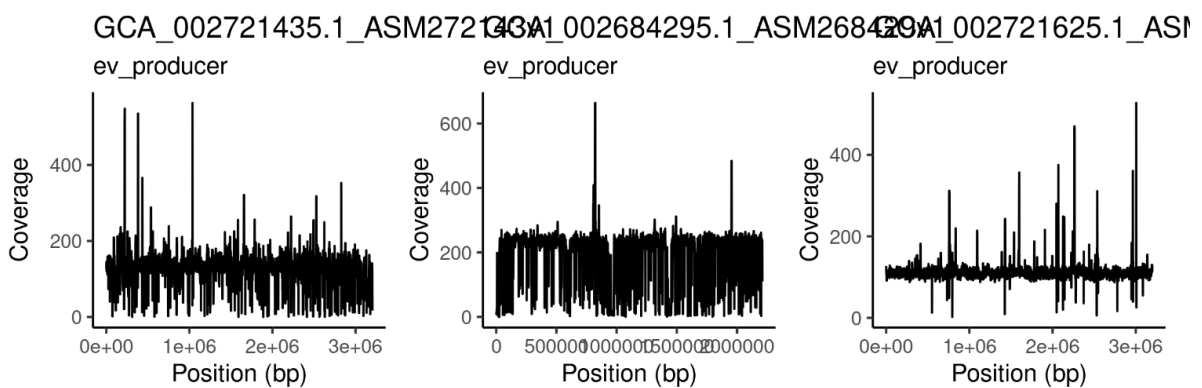

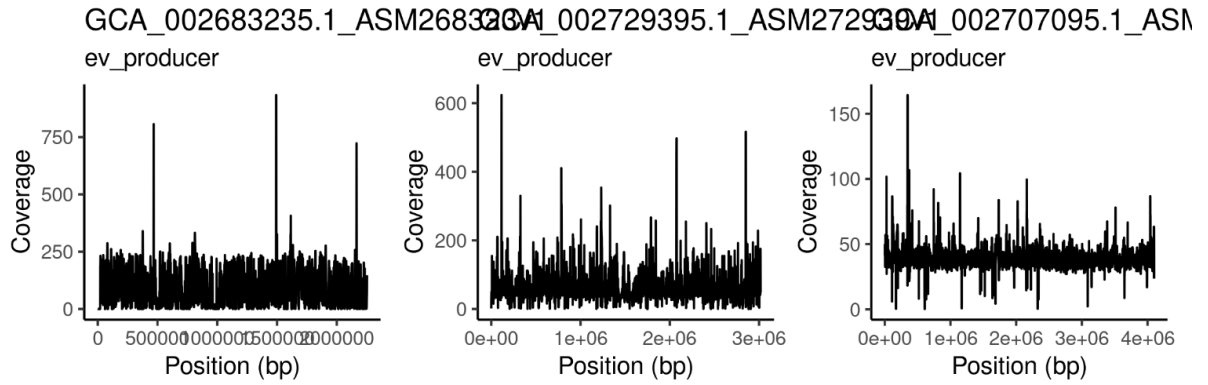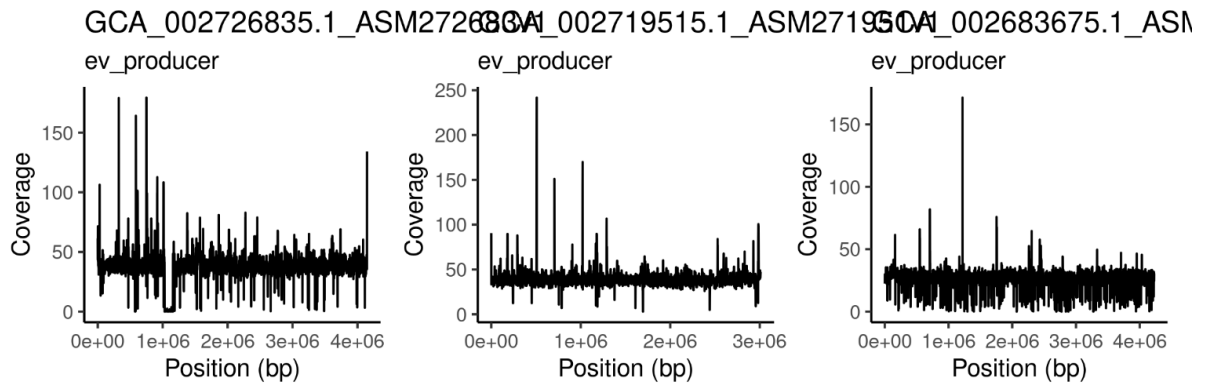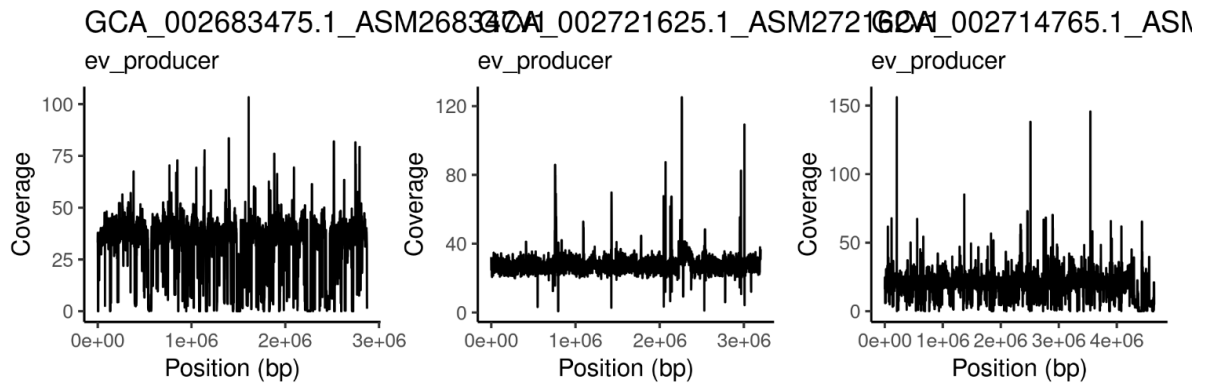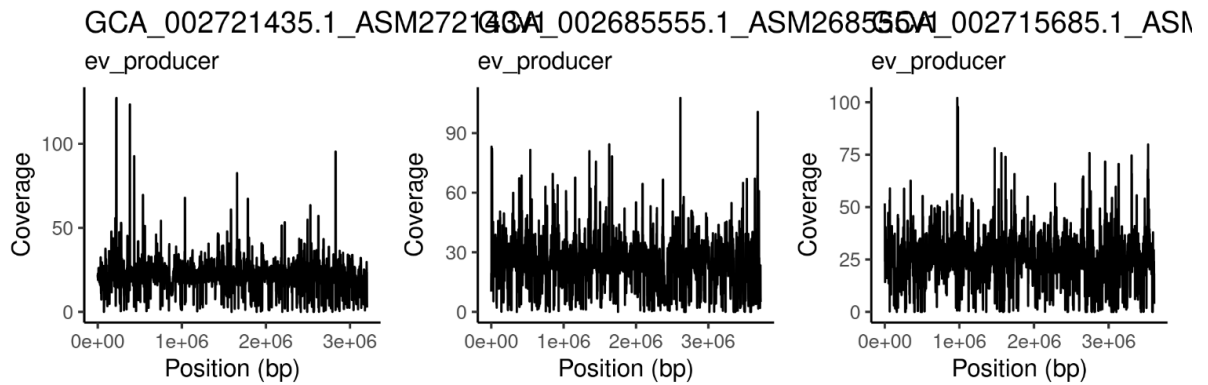

GCA\_002703665.1\_ASM270366.1\_002693845.1\_ASM269384.1\_002692955.1\_AS

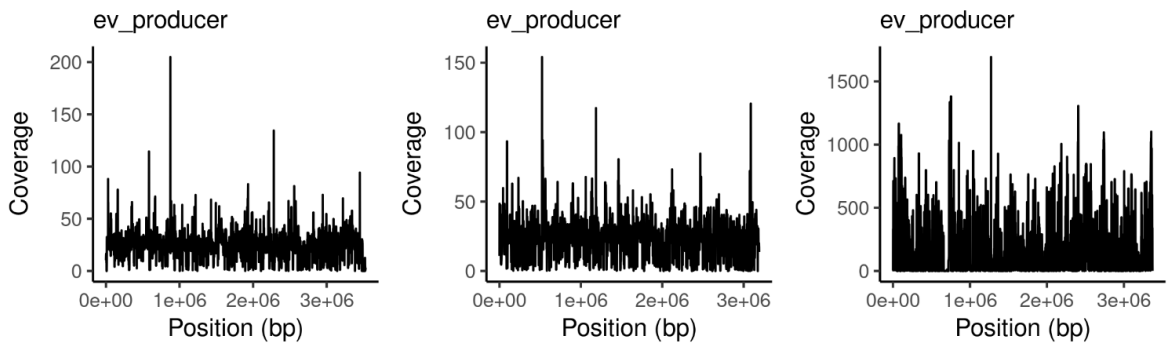

GCA\_002731595.1\_ASM273159.1\_002684455.1\_ASM268445.1\_002694765.1\_AS

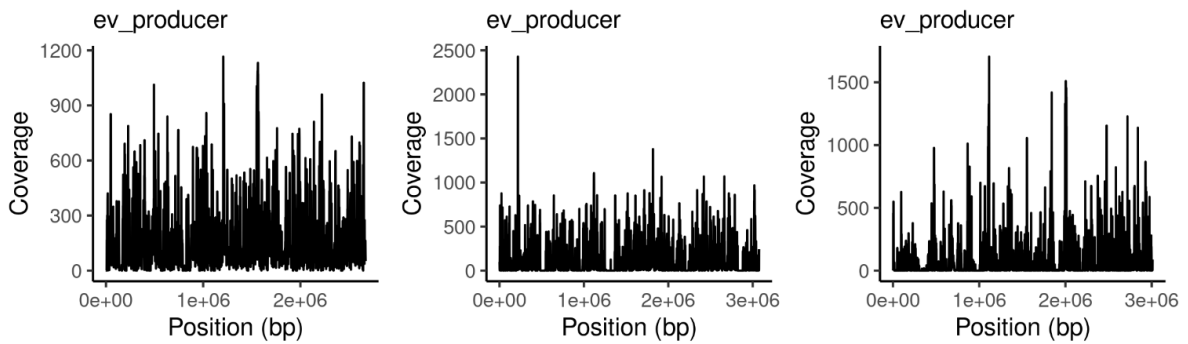

GCA\_002714865.1\_ASM271486.1\_002682935.1\_ASM268293.1\_002713425.1\_AS

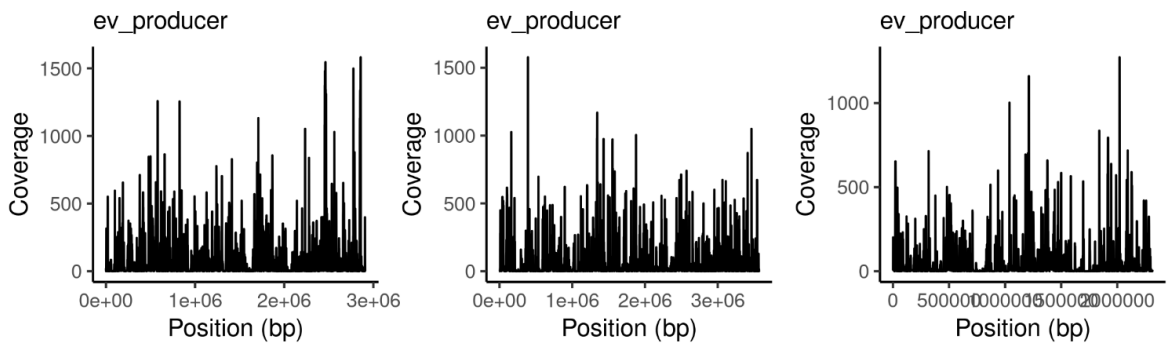

GCA\_002683615.1\_ASM268361.1\_002707095.1\_ASM270709.1\_002719515.1\_AS

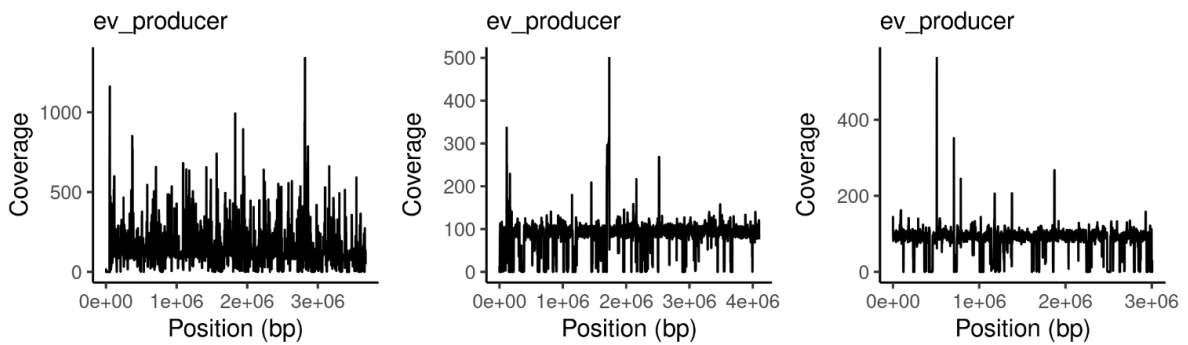

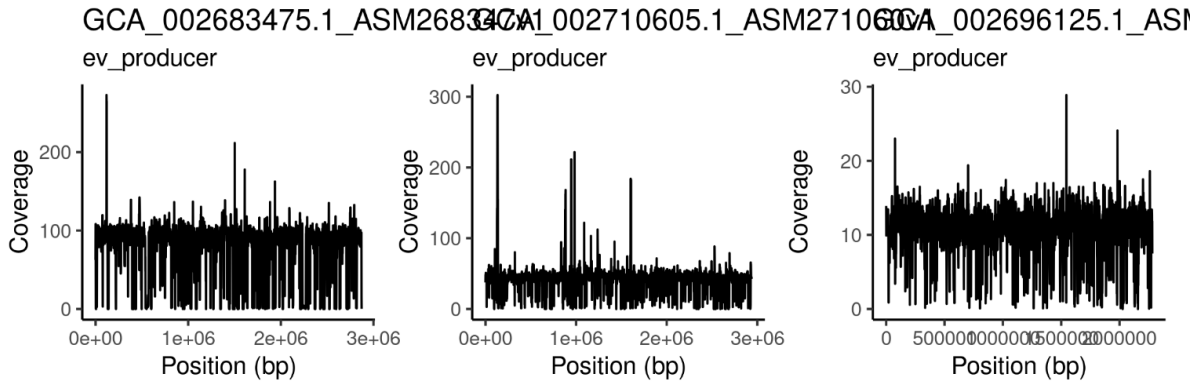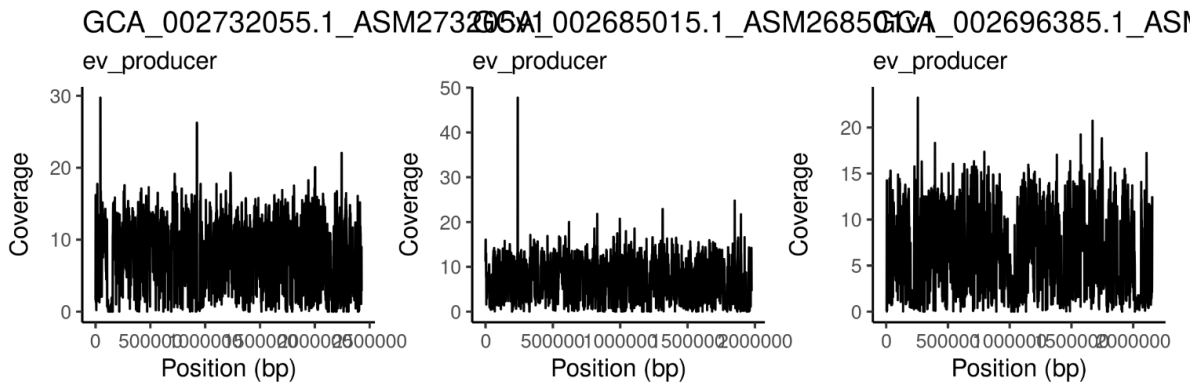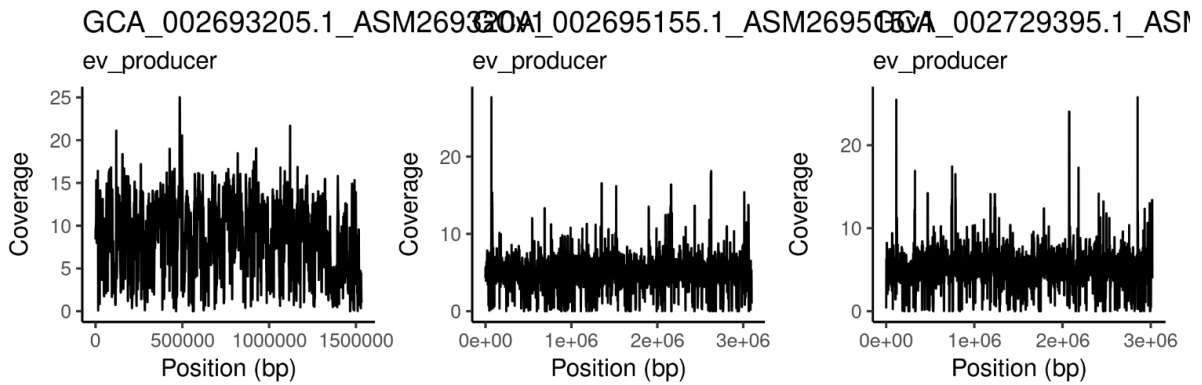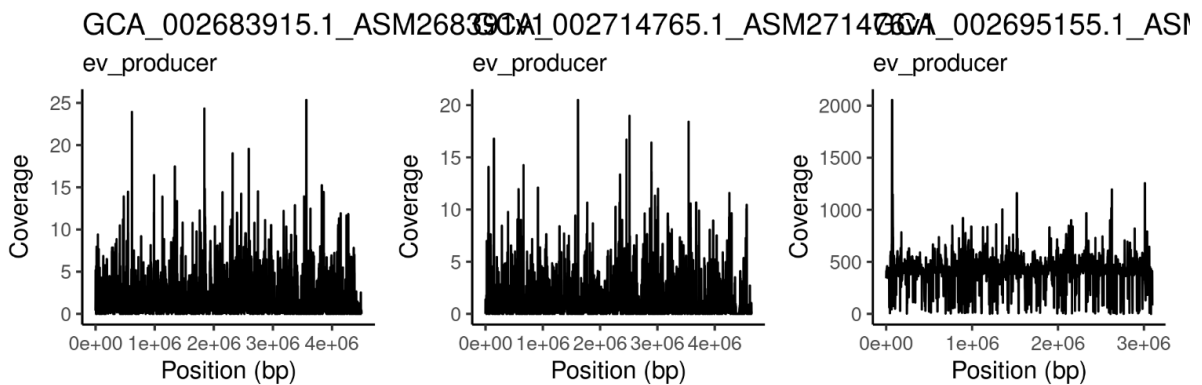

GCA\_002696105.1\_ASM269630A1\_002729395.1\_ASM272939A1\_002685555.1\_AS

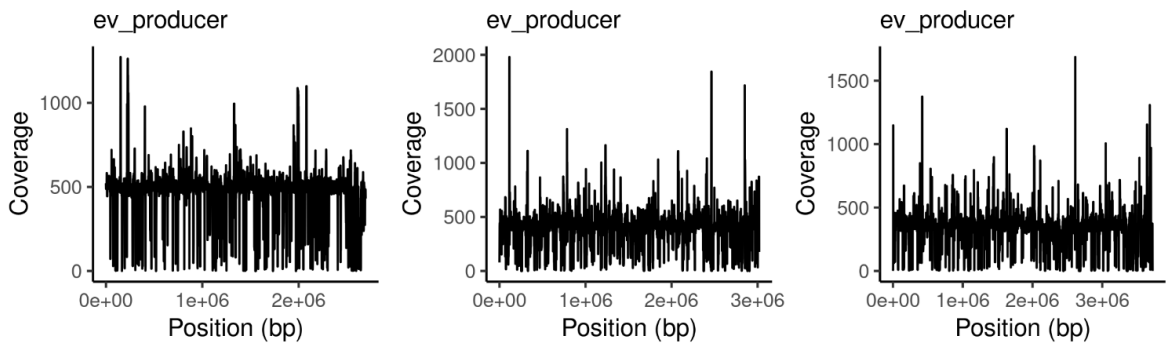

GCA\_002714765.1\_ASM271476A1\_002703665.1\_ASM270366A1\_002715685.1\_AS

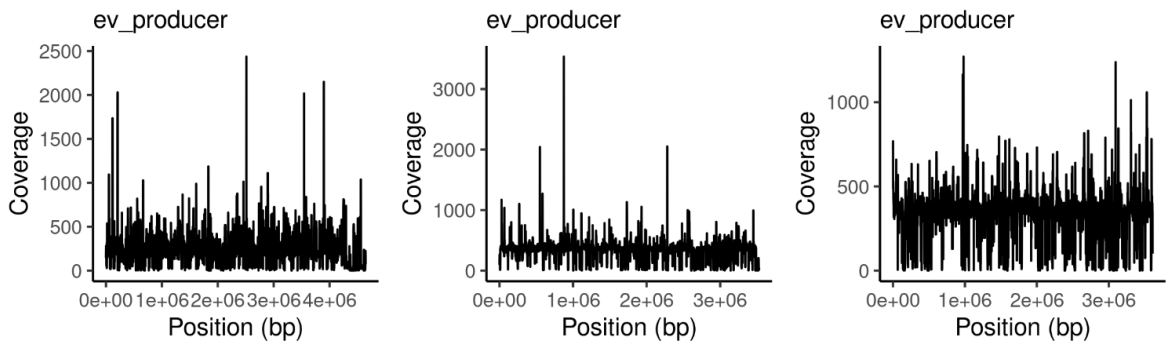

GCA\_002693845.1\_ASM269384A1\_002696305.1\_ASM269630A1\_002693505.1\_AS

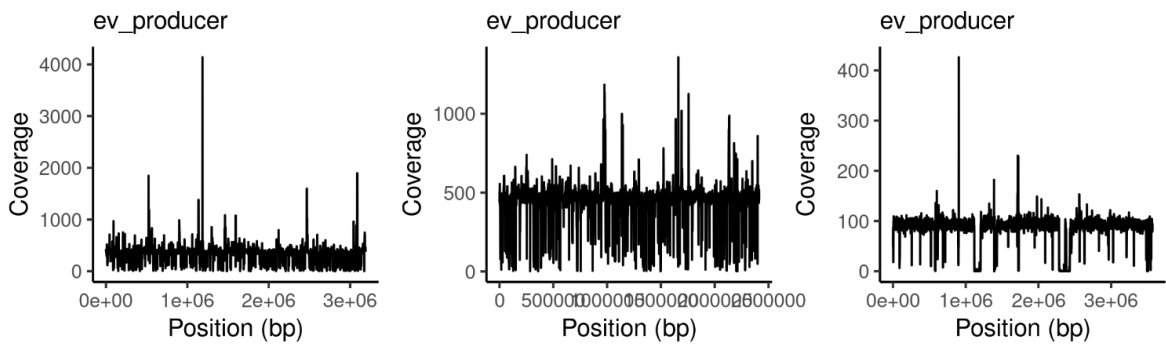

GCA\_002683615.1\_ASM268361A1\_002710445.1\_ASM271044A1\_002716205.1\_AS

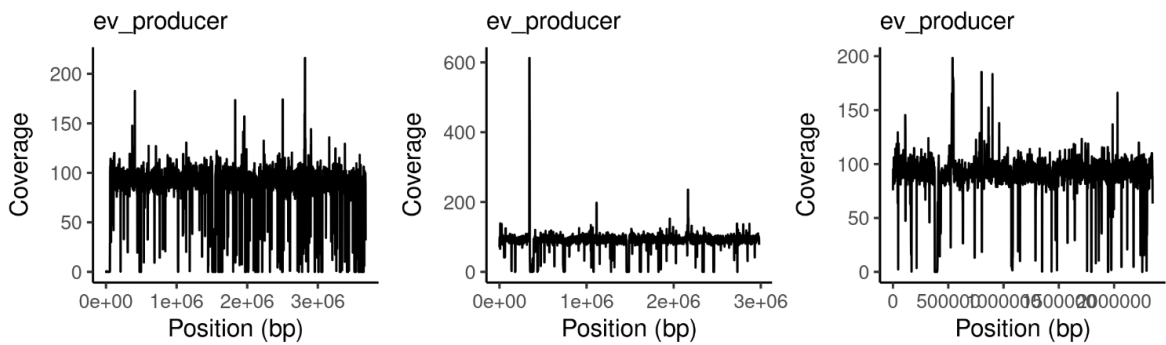

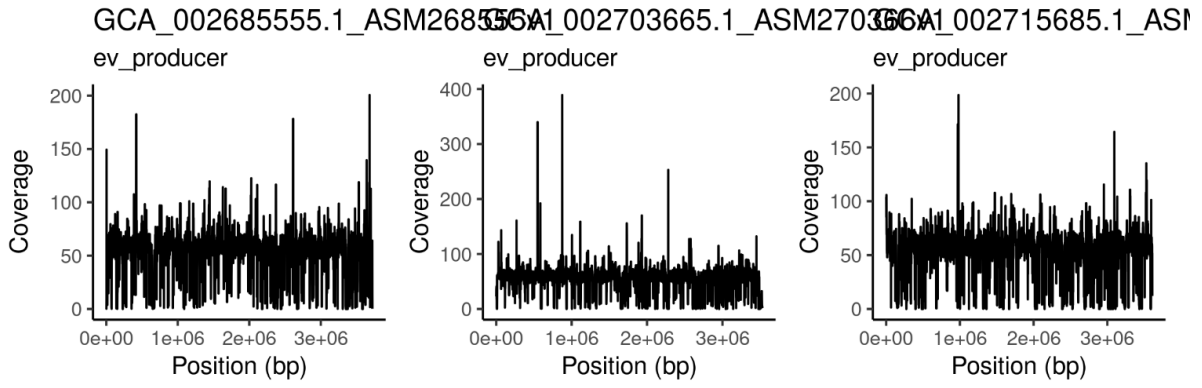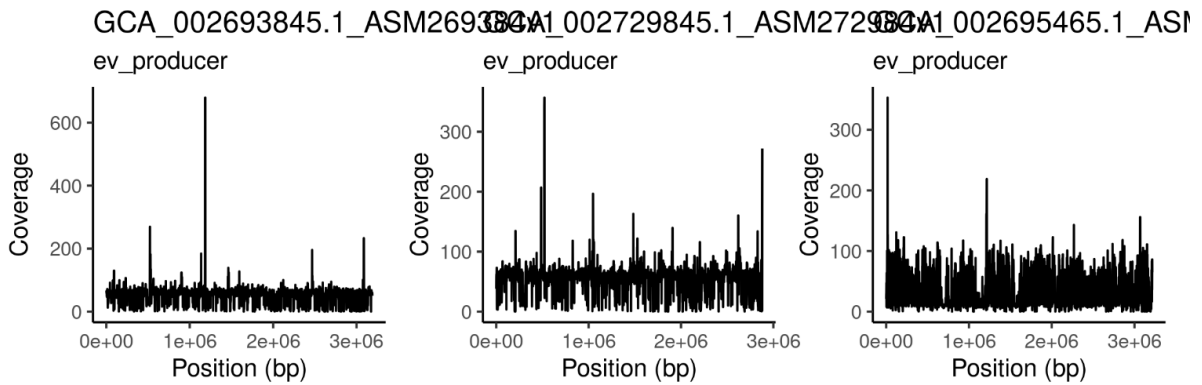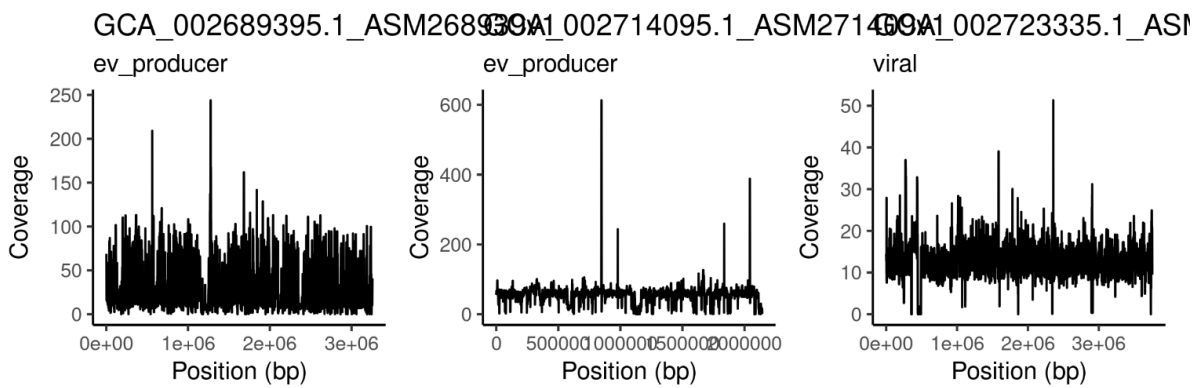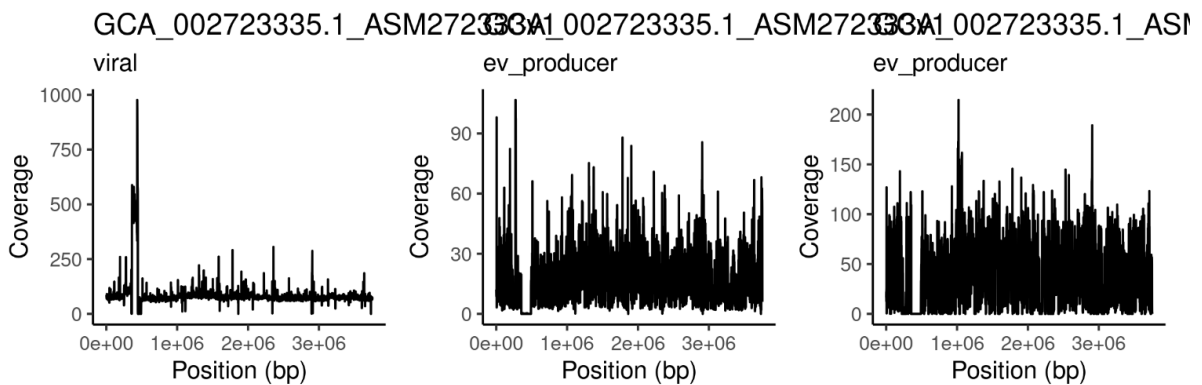

GCA\_002685565.1\_ASM268556A1\_002684005.1\_ASM268400A1\_002696075.1\_AS

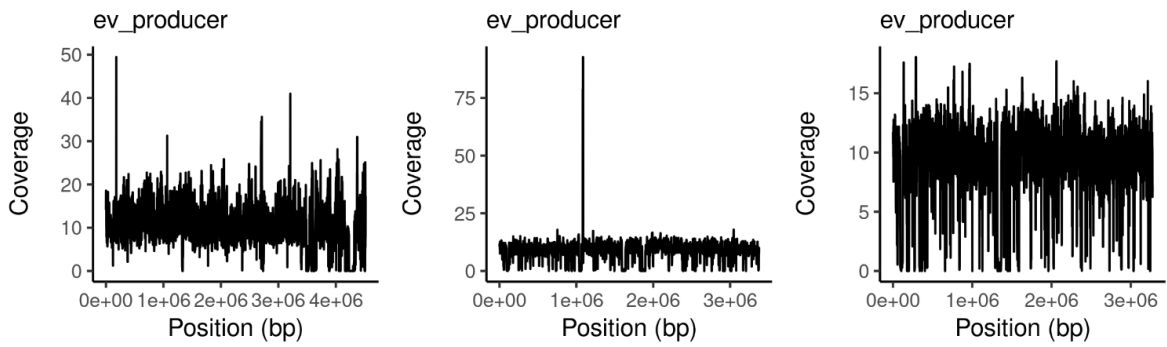

GCA\_002684275.1\_ASM268427A1\_002696605.1\_ASM269660A1\_002684095.1\_AS

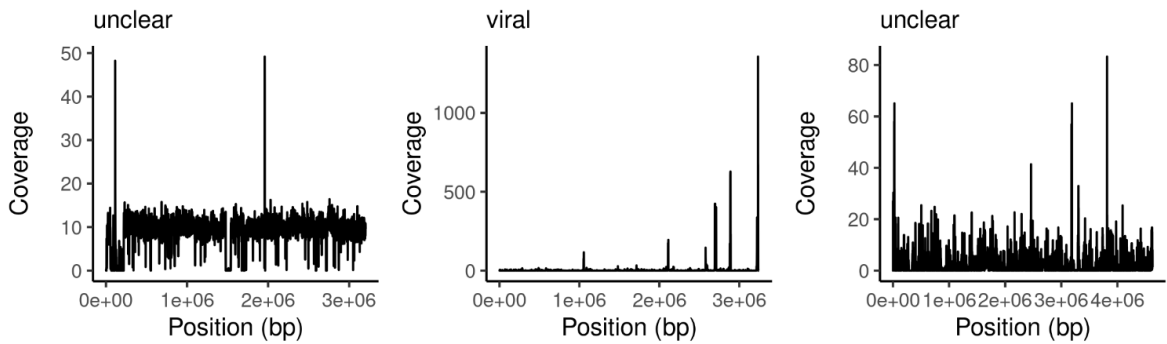

GCA\_002699145.1\_ASM269914A1\_002704665.1\_ASM270466A1\_002696005.1\_AS

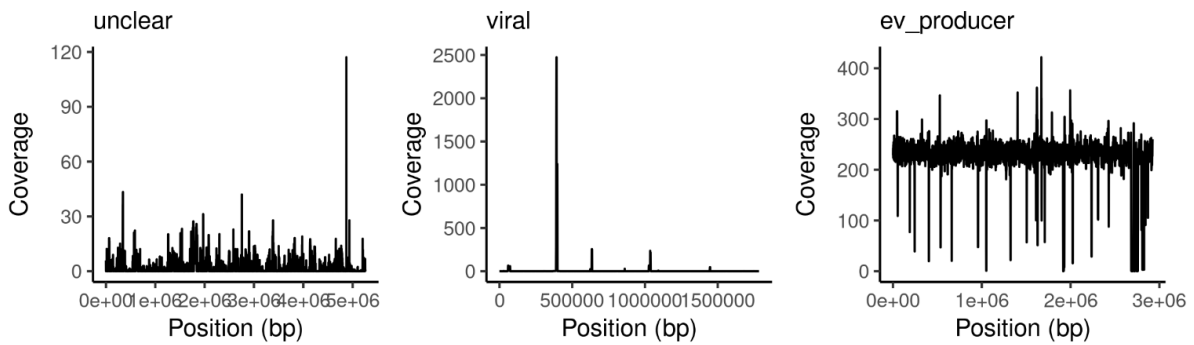

GCA\_002683435.1\_ASM268343A1\_002726345.1\_ASM272634A1\_002726615.1\_AS

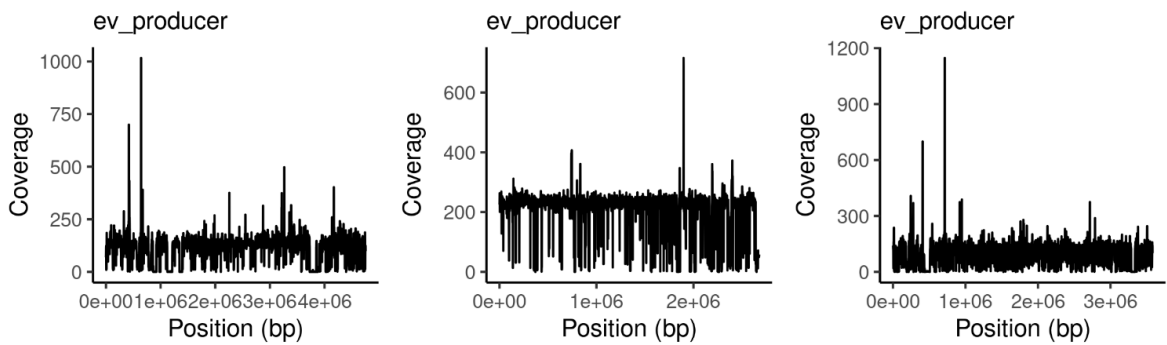



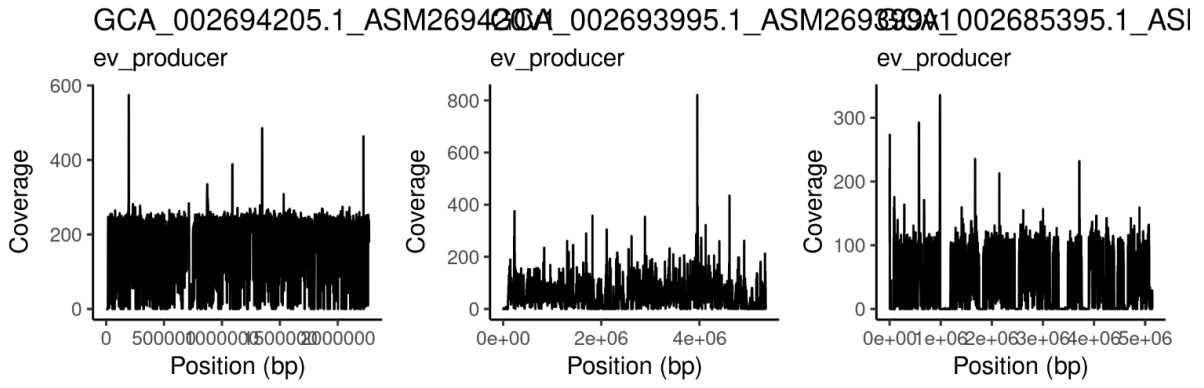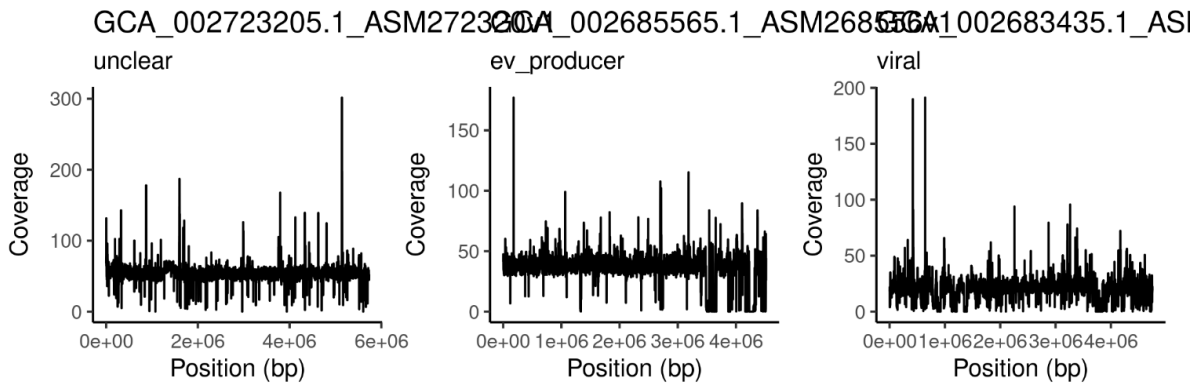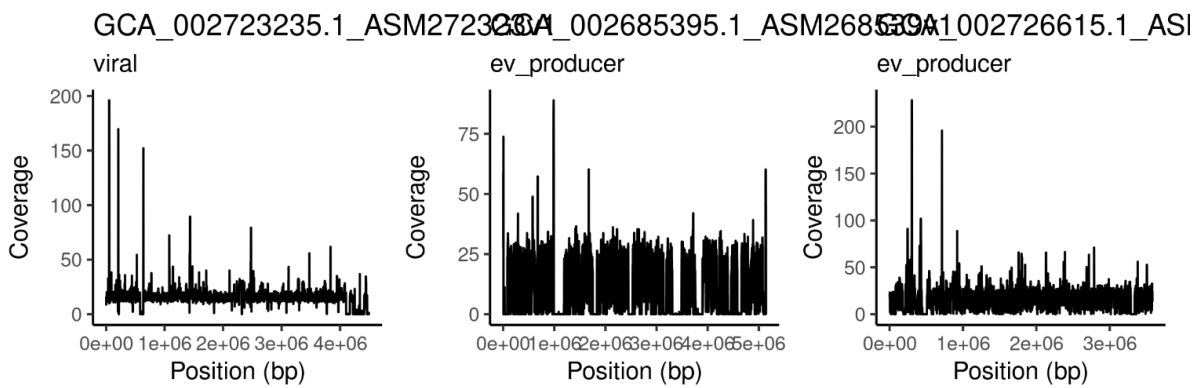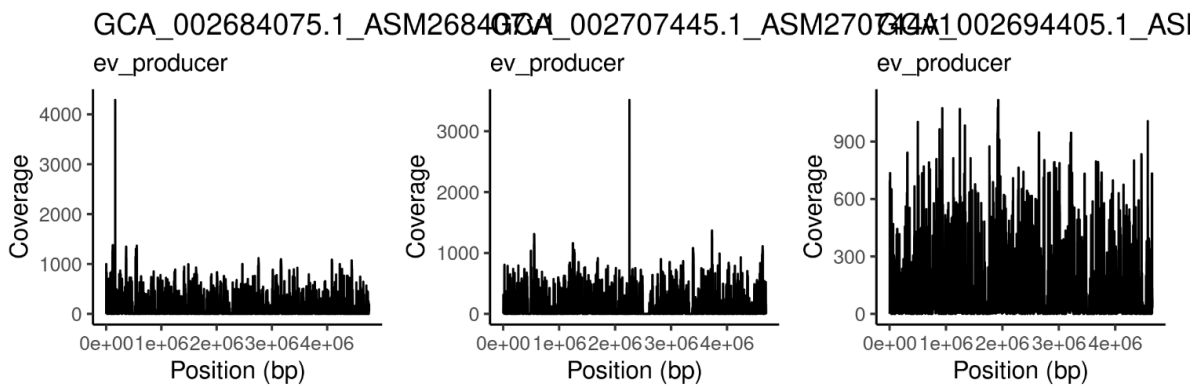

GCA\_002714365.1\_ASM271436A\_002709775.1\_ASM270977A\_002707405.1\_AS

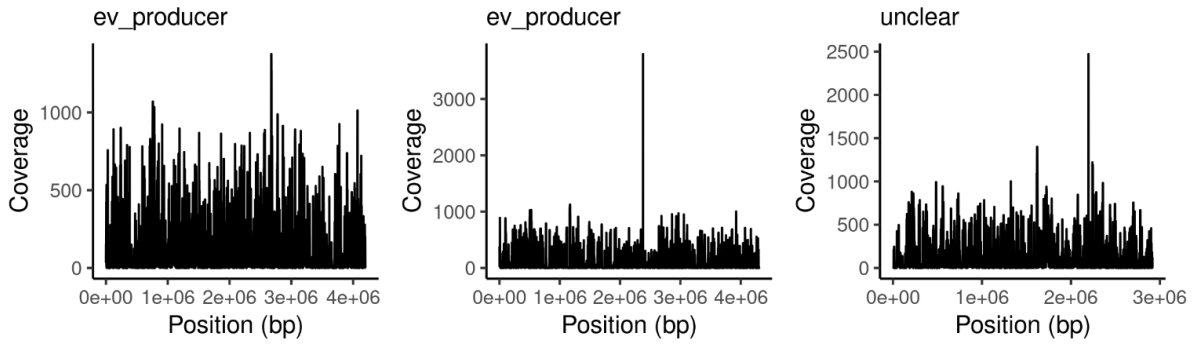

GCA\_002685075.1\_ASM268507A\_002722255.1\_ASM272225A\_002706045.1\_AS

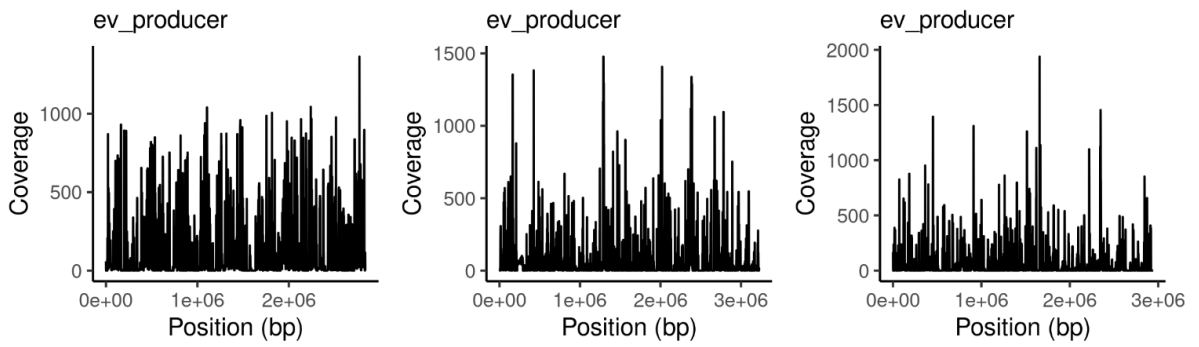

GCA\_002683975.1\_ASM268397A\_002726785.1\_ASM272678A\_002726195.1\_AS

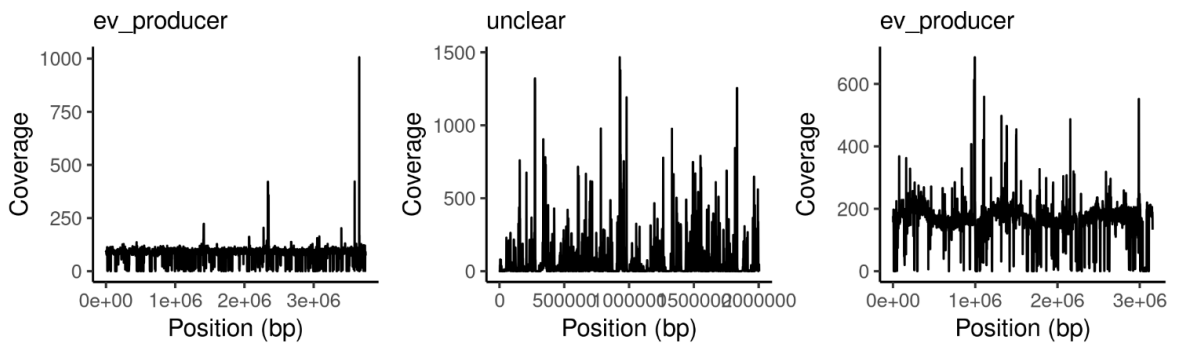

GCA\_002686735.1\_ASM268673A\_002683975.1\_ASM268397A\_002709125.1\_AS

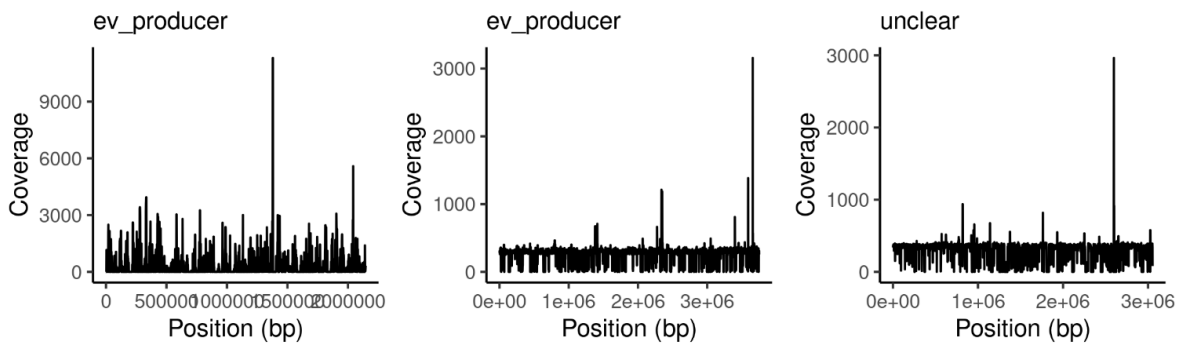

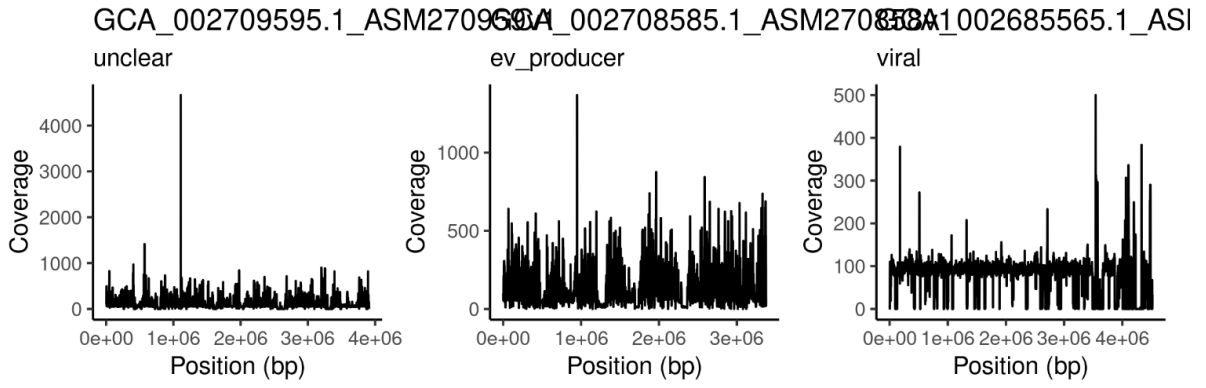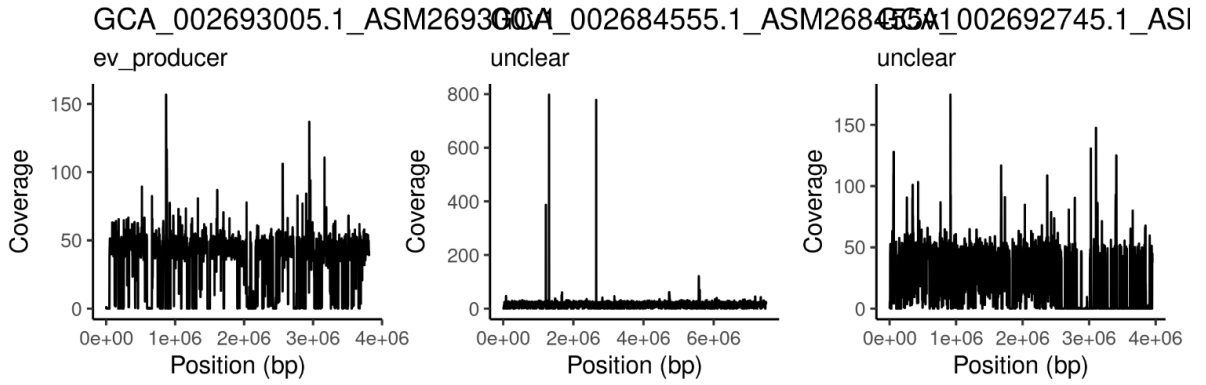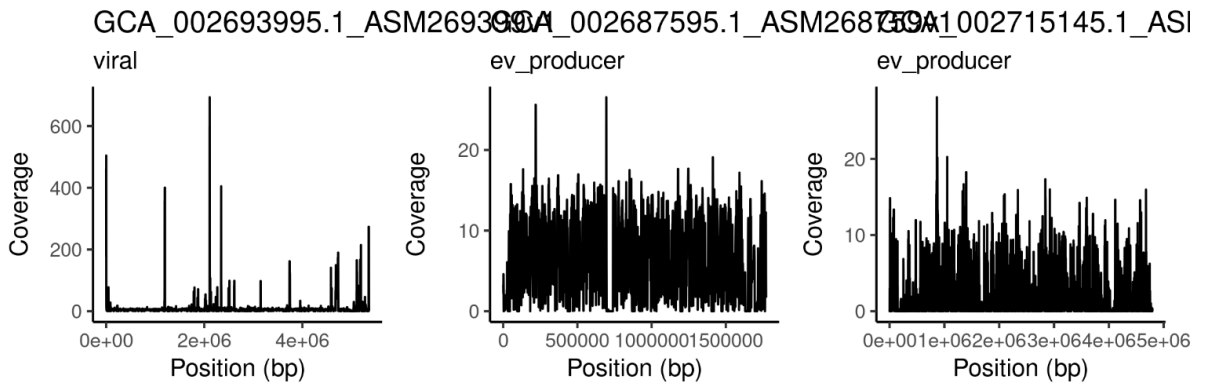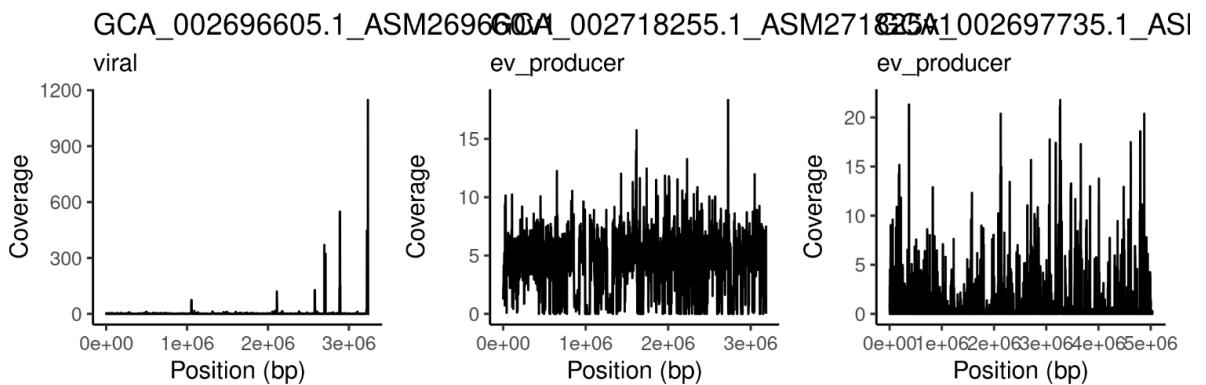

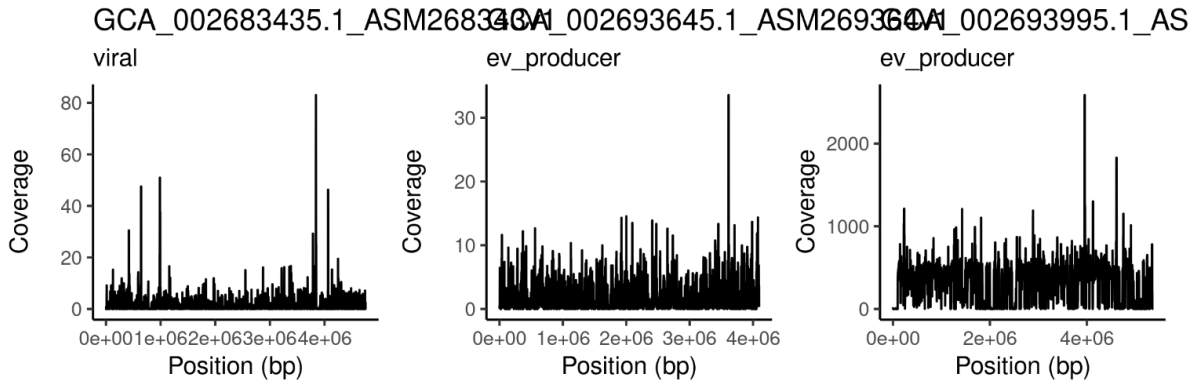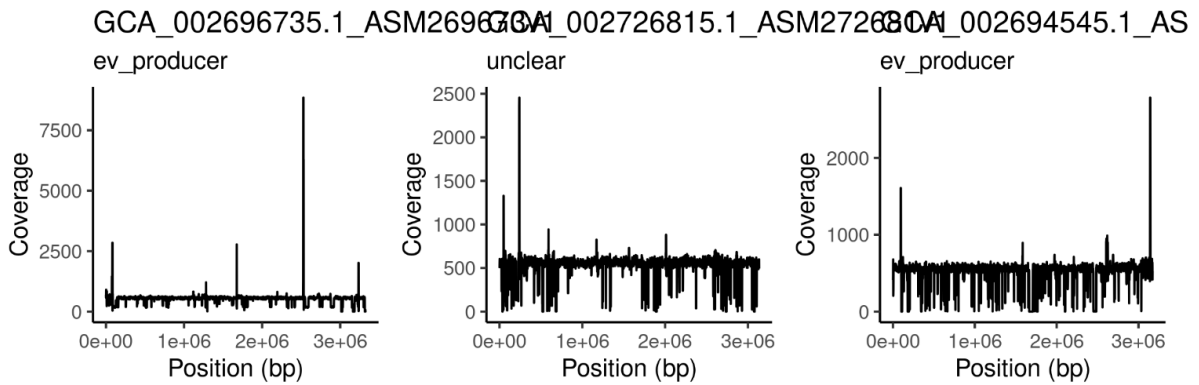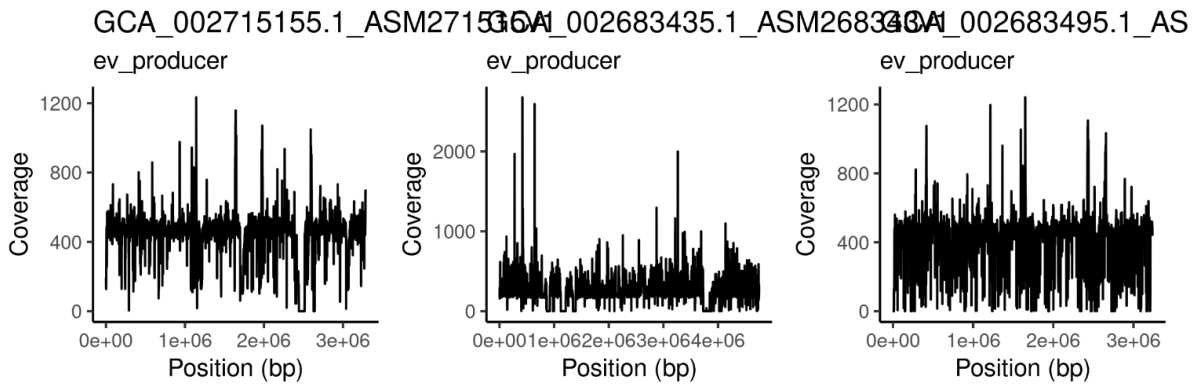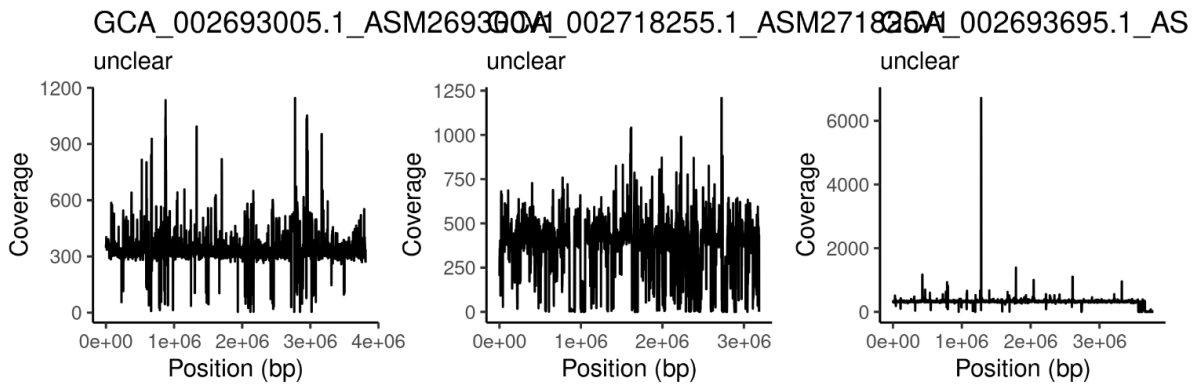

GCA\_002683555.1\_ASM268355v1 GCA\_002708585.1\_ASM270858v1 GCA\_002695955.1\_ASM

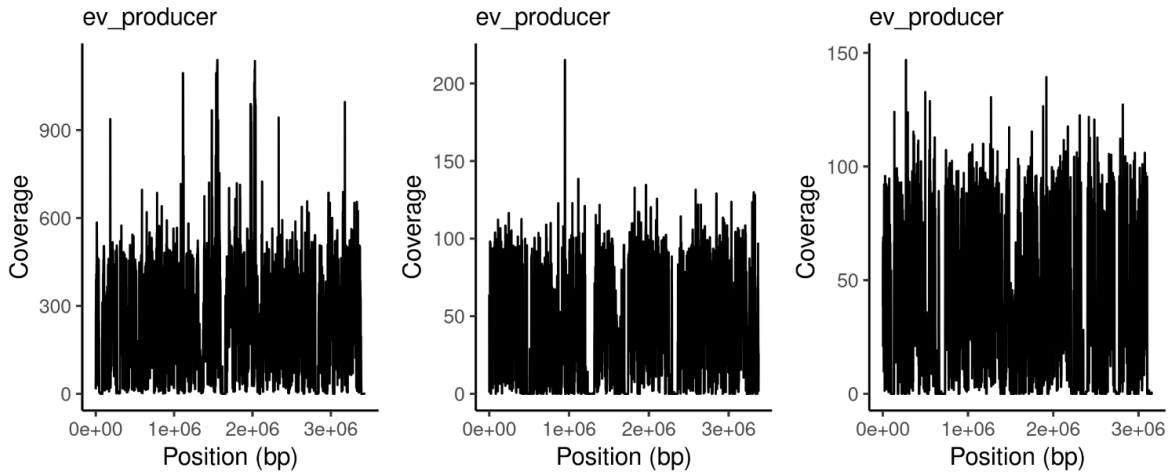

GCA\_002719735.1\_ASM271973v1 GCA\_002696185.1\_ASM269618v1 GCA\_002731335.1\_ASM

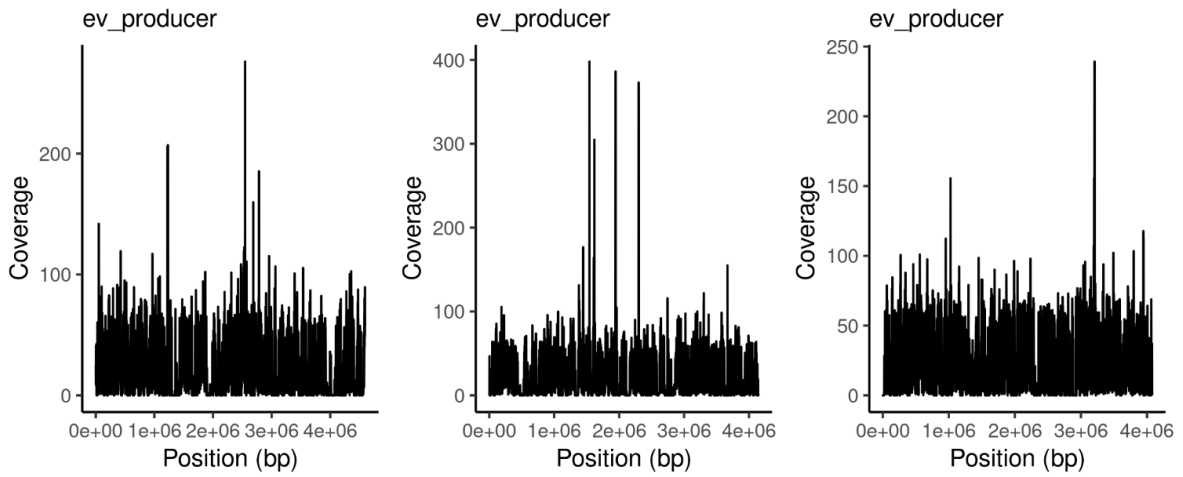

GCA\_002684005.1\_ASM268400v1

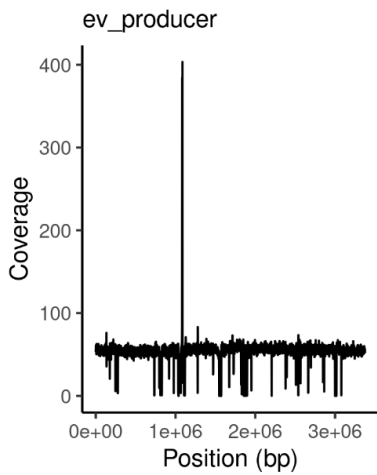

Supplement: 43705_2023_317_MOESM2_ESM.pdf [file 43705_2023_317_MOESM2_ESM.pdf]
